# Supplementary material
Source: MDPI journal article supplement (https://www.mdpi.com/2073-4395/11/9/1706)
Supplement: s1 [file s1]

## Supplementary Tables

Table S2(a)

Correlation coefficients among fodder quality and agronomic traits of breeding lines (n= 50; Lower diagonal) and landraces (n= 264; upper diagonal) of finger millet germplasm

| Trait <sup>#</sup> | DF       | DM       | GY      | SY       | HI       | BTN      | PH       | Dm       | Ash      | CP       | NDF      | ADF      | ADL      | ME       | IVOMD    |
|--------------------|----------|----------|---------|----------|----------|----------|----------|----------|----------|----------|----------|----------|----------|----------|----------|
| DF                 | 1        | 0.995**  | 0.031   | 0.628**  | -0.577** | -0.369** | 0.309**  | -0.422** | -0.438** | -0.331** | 0.041    | -0.192** | -0.249** | 0.411**  | 0.363**  |
| DM                 | 0.998**  | 1        | 0.028   | 0.624**  | -0.572** | -0.371** | 0.296**  | -0.424** | -0.441** | -0.324** | 0.043    | -0.189** | -0.244** | 0.408**  | 0.360**  |
| GY                 | 0.467**  | 0.462**  | 1       | 0.459**  | 0.583**  | 0.144*   | 0.022    | -0.118   | -0.114   | -0.304** | -0.007   | -0.095   | -0.014   | 0.113    | 0.050    |
| SY                 | 0.859**  | 0.861**  | 0.522** | 1        | -0.407** | -0.187** | 0.491**  | -0.217** | -0.483** | -0.573** | -0.134*  | -0.393** | -0.335** | 0.512**  | 0.404**  |
| HI                 | -0.708** | -0.710** | -0.024  | -0.836** | 1        | 0.365**  | -0.445** | 0.103    | 0.347**  | 0.192**  | 0.080    | 0.235**  | 0.292**  | -0.343** | -0.313** |
| BTN                | -0.493** | -0.498** | -0.193  | -0.475** | 0.439**  | 1        | -0.263** | 0.057    | 0.148*   | 0.082    | 0.153*   | 0.286**  | 0.257**  | -0.349** | -0.353** |
| PH                 | 0.753**  | 0.747**  | 0.353*  | 0.798**  | -0.752** | -0.319*  | 1        | 0.048    | -0.451** | -0.542** | 0.201**  | 0.034    | 0.049    | 0.269**  | 0.162**  |
| Dm                 | -0.145   | -0.151   | 0.154   | -0.232   | 0.344*   | -0.117   | -0.231   | 1        | 0.188**  | 0.061    | -0.097   | 0.078    | 0.111    | -0.116   | -0.124*  |
| Ash                | -0.032   | -0.028   | 0.116   | -0.081   | 0.188    | -0.184   | -0.179   | 0.220    | 1        | 0.661**  | -0.383** | -0.028   | -0.081   | -0.486** | -0.341** |
| CP                 | -0.163   | -0.156   | -0.073  | -0.242   | 0.282*   | -0.179   | -0.328*  | 0.224    | 0.591**  | 1        | -0.301** | -0.091   | -0.112   | -0.499** | -0.332** |
| NDF                | -0.173   | -0.183   | -0.009  | -0.379** | 0.436**  | 0.463**  | -0.134   | 0.302*   | -0.249   | -0.109   | 1        | 0.775**  | 0.838**  | -0.383** | -0.487** |
| ADF                | -0.504** | -0.513** | -0.172  | -0.616** | 0.559**  | 0.547**  | -0.268   | 0.330*   | -0.084   | -0.122   | 0.770**  | 1        | 0.834**  | -0.551** | -0.581** |
| ADL                | -0.380** | -0.385** | -0.122  | -0.533** | 0.537**  | 0.502**  | -0.221   | 0.305*   | -0.124   | -0.126   | 0.876**  | 0.894**  | 1        | -0.647** | -0.736** |
| ME                 | 0.280*   | 0.282*   | -0.043  | 0.411**  | -0.491** | -0.324*  | 0.275    | -0.362** | -0.390** | -0.257   | -0.627** | -0.642** | -0.743** | 1        | 0.976**  |
| IVOMD              | 0.239    | 0.241    | -0.049  | 0.351*   | -0.425** | -0.359** | 0.210    | -0.308*  | -0.246   | -0.092   | -0.673** | -0.637** | -0.786** | 0.977**  | 1        |

<sup>#</sup>DF= Days to 50% flowering, DM= Days to maturity, GY=Grain yield (kg ha<sup>-1</sup>), SY=Stover yield (kg ha<sup>-1</sup>), HI=Harvest index, BTN=Basal tillers number, PH=Plant height (cm), Dm= Dry matter (%), Ash content (%), CP=Crude protein (%), NDF=Neutral detergent fiber (%), ADF=Acid detergent fiber (%), ADL=Acid detergent lignin (%), ME=Metabolizable energy (MJ/kg Dm), IVOMD=*in vitro* organic matter digestibility (%).

\*, \*\* Significant at P≤0.05, 0.01 probability levels, respectively.

Table S2(b)

Correlation coefficients among fodder quality and agronomic traits of finger millet accessions from Africa (n= 160; lower diagonal) and Asia (n= 136; upper diagonal)

| Trait <sup>#</sup> | DF       | DM       | GY       | SY       | HI       | BTN      | PH       | Dm       | Ash      | CP       | NDF      | ADF      | ADL      | ME       | IVOMD    |
|--------------------|----------|----------|----------|----------|----------|----------|----------|----------|----------|----------|----------|----------|----------|----------|----------|
| DF                 | 1        | 0.997**  | 0.128    | 0.707**  | -0.667** | -0.408** | 0.526**  | -0.449** | -0.289** | -0.297** | -0.097   | -0.362** | -0.433** | 0.458**  | 0.424**  |
| DM                 | 0.992**  | 1        | 0.121    | 0.709**  | -0.673** | -0.412** | 0.521**  | -0.439** | -0.286** | -0.288** | -0.106   | -0.366** | -0.436** | 0.454**  | 0.420**  |
| GY                 | -0.069   | -0.060   | 1        | 0.549**  | 0.439**  | 0.053    | 0.227**  | 0.008    | -0.012   | -0.267** | -0.151   | -0.299** | -0.174*  | 0.109    | 0.054    |
| SY                 | 0.394**  | 0.392**  | 0.412**  | 1        | -0.463** | -0.217*  | 0.664**  | -0.344** | -0.335** | -0.488** | -0.264*  | -0.544** | -0.478** | 0.476**  | 0.381**  |
| HI                 | -0.381** | -0.372** | 0.736**  | -0.273** | 1        | 0.365**  | -0.489** | 0.363**  | 0.365**  | 0.214*   | 0.084    | 0.209*   | 0.325**  | -0.384** | -0.351** |
| BTN                | -0.106   | -0.111   | 0.213**  | 0.027    | 0.220**  | 1        | -0.233** | 0.059    | 0.001    | -0.062   | 0.245**  | 0.348**  | 0.356**  | -0.313** | -0.342** |
| PH                 | -0.146   | -0.160*  | -0.163*  | 0.151    | -0.293** | 0.013    | 1        | -0.180*  | -0.401** | -0.528** | 0.125    | -0.080   | -0.044   | 0.260**  | 0.158    |
| Dm                 | -0.256** | -0.276** | -0.193*  | 0.035    | -0.211** | -0.092   | 0.311**  | 1        | 0.297**  | 0.158    | 0.154    | 0.329**  | 0.349**  | -0.371** | -0.350** |
| Ash                | -0.274** | -0.277** | -0.106   | -0.286** | 0.116    | -0.087   | -0.225** | 0.015    | 1        | 0.611**  | -0.343** | -0.040   | -0.056   | -0.414** | -0.272** |
| CP                 | -0.056   | -0.052   | -0.290** | -0.371** | -0.054   | -0.181*  | -0.282** | -0.063   | 0.580**  | 1        | -0.144   | 0.000    | 0.019    | -0.467** | -0.309** |
| NDF                | 0.022    | 0.026    | 0.071    | -0.258** | 0.257**  | 0.305**  | 0.102    | -0.195*  | -0.344** | -0.328** | 1        | 0.740**  | 0.821**  | -0.451** | -0.523** |
| ADF                | -0.099   | -0.097   | 0.051    | -0.382** | 0.336**  | 0.338**  | 0.079    | -0.096   | -0.093   | -0.233** | 0.832**  | 1        | 0.830**  | -0.573** | -0.571** |
| ADL                | -0.137   | -0.134   | 0.108    | -0.323** | 0.358**  | 0.303**  | 0.061    | -0.070   | -0.139   | -0.263** | 0.880**  | 0.860**  | 1        | -0.728** | -0.784** |
| ME                 | 0.225**  | 0.224**  | 0.030    | 0.401**  | -0.252** | -0.245** | 0.103    | 0.126    | -0.432** | -0.359** | -0.492** | -0.567** | -0.641** | 1        | 0.978**  |
| IVOMD              | 0.215**  | 0.215**  | -0.027   | 0.326**  | -0.260** | -0.290** | 0.049    | 0.096    | -0.303** | -0.196*  | -0.580** | -0.604** | -0.729** | 0.978**  | 1        |

<sup>#</sup>DF= Days to 50% flowering, DM= Days to maturity, GY=Grain yield (kg ha<sup>-1</sup>), SY=Stover yield (kg ha<sup>-1</sup>), HI=Harvest index, BTN=Basal tillers number, PH=Plant height (cm), Dm= Dry matter (%), Ash content (%), CP=Crude protein (%), NDF=Neutral detergent fiber (%), ADF=Acid detergent fiber (%), ADL=Acid detergent lignin (%), ME=Metabolizable energy (MJ/kg Dm), IVOMD=*in vitro* organic matter digestibility (%).

\*, \*\* Significant at P≤0.05, 0.01 probability levels, respectively.
